# Supplementary material for: Interchanging Functionality Among Homologous Elongation Factors Using Signatures of Heterotachy
Source: PubMed Central journal article supplement (PMC3585904; doi:10.1007/s00239-013-9540-9), 2013-01-31
Supplement: 239_2013_9540_MOESM1_ESM.pdf [file 239_2013_9540_MOESM1_ESM.pdf]

# Interchanging functionality among homologous elongation factors using signatures of heterotachy

Ercan Cacan, James T. Kratzer, Megan F. Cole and Eric A. Gaucher

| Sites to disrupt eEF1B binding to eEF1A |                             |                |                                 |                          | Variant |     |     |
|-----------------------------------------|-----------------------------|----------------|---------------------------------|--------------------------|---------|-----|-----|
| Yeast                                   | Residue Number <sup>1</sup> | <i>E. coli</i> | Heterotachy/Type I <sup>2</sup> | CBD/Type II <sup>3</sup> | KO1     | KO2 | KO3 |
| R                                       | 67                          | K              | 95.8%                           |                          | ■       | ■   | ■   |
| E                                       | <b>68</b>                   | A              | 98.0%                           |                          |         |     |     |
| D                                       | 74                          | N              | 96.0%                           |                          |         |     |     |
| V                                       | 89                          | H              | 91.8%                           |                          |         |     |     |
| K                                       | 253                         | S              | 90.6%                           |                          |         |     |     |
| F                                       | 308                         | V              | 98.6%                           |                          |         |     |     |
| D                                       | 360                         | K              | 99.9%                           |                          |         |     |     |
| R                                       | 428                         | G              | 92.3%                           |                          |         |     |     |
| I                                       | 75                          | T              | 84.1%                           | ■                        | ■       | ■   |     |
| I                                       | 90                          | V              | 84.3%                           |                          |         |     |     |
| Y                                       | 252                         | F              | 82.9%                           |                          |         |     |     |
| N                                       | 309                         | L              | 82.7%                           |                          |         |     |     |
| K                                       | <b>64</b>                   | P              |                                 |                          | 59.9    | ■   | ■   |
| L                                       | 77                          | H              |                                 |                          | 59.9    |     |     |
| T                                       | 106                         | A              |                                 |                          | 59.9    |     |     |
| S                                       | 107                         | A              |                                 |                          | 59.9    |     |     |
| Q                                       | 249                         | E              |                                 |                          | 59.9    |     |     |
| I                                       | 257                         | R              |                                 |                          | 59.9    |     |     |
| V                                       | 262                         | T              |                                 |                          | 59.9    |     |     |
| H                                       | 293                         | F              |                                 |                          | 19.1    |     |     |
| Q                                       | 429                         | R              |                                 | 59.9                     |         |     |     |

<sup>1</sup> Residue numbering is based on the sequence of yeast eEF1A (PDB: 1F60) and **bolded** sites are present in both KnockOut and KnockIn variants (See Table S2).

<sup>2</sup> Heterotachy/Type I sites with Posterior Probabilities (PP) listed were determined using DIVERGE's Gu99 algorithm, except those in red where DIVERGE's Gu01 algorithm was used.

<sup>3</sup> CBD/Type II sites (those additional sites only present in KO3) were ranked by their reported DIVERGE Type II score.

**Table S1.** KnockOut eEF1B binding by replacing residues in eEF1A that have a specified signature of functional divergence and are within 5 Ångstroms of eEF1B binding (PDB:1F60). In the first variant, KO1, sites having PP ≥ 90% for heterotachy/Type I were selected (8 replacements). In the second variant, KO2, sites having PP ≥ 80% for heterotachy/Type I were selected (12 replacements). In the third variant, KO3, sites having PP ≥ 80% for heterotachy/Type I plus the highest ranked CBD/Type II sites were selected (21 replacements).

| Sites to introduce EF-Ts binding to eEF1A |                             |                |                                  |                           | Variant |       |      |     |     |
|-------------------------------------------|-----------------------------|----------------|----------------------------------|---------------------------|---------|-------|------|-----|-----|
| Yeast                                     | Residue Number <sup>1</sup> | <i>E. coli</i> | Heterotachy/ Type I <sup>2</sup> | CBD/ Type II <sup>3</sup> | KI1     | KI2   | KI3  |     |     |
| F                                         | 54                          | A              | 99.5%                            |                           | Blue    | Blue  | Blue |     |     |
| K                                         | 55                          | R              | 99.4%                            |                           |         |       |      |     |     |
| Y                                         | 56                          | A              | 99.5%                            |                           |         |       |      |     |     |
| A                                         | 57                          | F              | 96.0%                            |                           |         |       |      |     |     |
| W                                         | 58                          | D              | 95.8%                            |                           |         |       |      |     |     |
| E                                         | <b>68</b>                   | A              | 98.0%                            |                           |         |       |      |     |     |
| I                                         | 115                         | V              | 98.6%                            |                           |         |       |      |     |     |
| V                                         | 120                         | D              | 99.9%                            |                           |         |       |      |     |     |
| D                                         | 130                         | M              | 98.3%                            |                           |         |       |      |     |     |
| S                                         | 163                         | E              | 99.9%                            |                           |         |       |      |     |     |
| Q                                         | 166                         | E              | 92.2%                            |                           |         |       |      |     |     |
| K                                         | 170                         | M              | 91.2%                            |                           |         |       |      |     |     |
| F                                         | 175                         | L              | 91.7%                            |                           |         |       |      |     |     |
| K                                         | 178                         | Q              | 99.9%                            |                           |         |       |      |     |     |
| W                                         | 194                         | L              | 90.9%                            |                           |         |       |      |     |     |
| N                                         | 346                         | S              | 95.4%                            |                           |         |       |      |     |     |
| P                                         | 348                         | D              | 91.2%                            |                           |         |       |      |     |     |
| S                                         | 394                         | P              | 96.4%                            |                           |         |       |      |     |     |
| S                                         | 18                          | H              | 84.2%                            | White                     |         |       |      | Red | Red |
| T                                         | 23                          | L              | 84.4%                            |                           |         |       |      |     |     |
| L                                         | 60                          | I              | 82.9%                            |                           |         |       |      |     |     |
| K                                         | 129                         | P              | 82.7%                            |                           |         |       |      |     |     |
| R                                         | 164                         | L              | 83.8%                            |                           |         |       |      |     |     |
| V                                         | 179                         | Y              | 85.2%                            |                           |         |       |      |     |     |
| Q                                         | 350                         | C              | 84.8%                            |                           |         |       |      |     |     |
| K                                         | <b>64</b>                   | P              |                                  |                           | 59.9    | Green |      |     |     |
| E                                         | 167                         | L              |                                  |                           | 59.9    |       |      |     |     |
| G                                         | 193                         | A              |                                  |                           | 59.9    |       |      |     |     |
| G                                         | 196                         | A              |                                  | 59.9                      |         |       |      |     |     |
| G                                         | 349                         | E              |                                  | 59.9                      |         |       |      |     |     |
| M                                         | 427                         | G              |                                  | 59.9                      |         |       |      |     |     |

<sup>1</sup> Residue numbering is based on the sequence of yeast eEF1A (PDB: 1F60) and **bolded** sites are present in both KnockOut and KnockIn variants (See Table S1).

<sup>2</sup> Heterotachy/Type I sites with Posterior Probabilities (PP) listed were determined using DIVERGE's Gu99 algorithm, except those in red where DIVERGE's Gu01 algorithm was used.

<sup>3</sup> CBD/Type II sites (those additional sites only present in KI3) were ranked by their reported DIVERGE Type II score.

**Table S2.** Knockin EF-Ts binding by replacing residues in eEF1A that have a specified signal of functional divergence and are within 5 Ångstroms of EF-Ts based on a structural alignment of PDBs 1F60 and 1EFU. In the first variant, KI1, sites having PP ≥ 90% for heterotachy/Type I were selected (18 replacements). In the second variant, KI2, sites having PP ≥ 80% for heterotachy/Type I were selected (25 replacements). In the third variant, KI3, sites having PP ≥ 80% for heterotachy/Type I plus the highest ranked CBD/Type II sites were selected (31 replacements).

| Sites to disrupt eEF1B binding to eEF1A and introduce EF-Ts binding to eEF1A |                             |                |                                  |                           | Variant |       |
|------------------------------------------------------------------------------|-----------------------------|----------------|----------------------------------|---------------------------|---------|-------|
| Yeast                                                                        | Residue Number <sup>1</sup> | <i>E. coli</i> | Heterotachy/ Type I <sup>2</sup> | CBD/ Type II <sup>3</sup> | KOKI2   | KOKI3 |
| S                                                                            | 18                          | H              | 84.2%                            |                           |         |       |
| T                                                                            | 23                          | L              | 84.4%                            |                           |         |       |
| F                                                                            | 54                          | A              | 99.5%                            |                           |         |       |
| K                                                                            | 55                          | R              | 99.4%                            |                           |         |       |
| Y                                                                            | 56                          | A              | 99.5%                            |                           |         |       |
| A                                                                            | 57                          | F              | 96.0%                            |                           |         |       |
| W                                                                            | 58                          | D              | 95.8%                            |                           |         |       |
| L                                                                            | 60                          | I              | 82.9%                            |                           |         |       |
| R                                                                            | 67                          | K              | 95.8%                            |                           |         |       |
| E                                                                            | <b>68</b>                   | A              | 98.0%                            |                           |         |       |
| D                                                                            | 74                          | N              | 96.0%                            |                           |         |       |
| I                                                                            | 75                          | T              | 84.1%                            |                           |         |       |
| V                                                                            | 89                          | H              | 91.8%                            |                           |         |       |
| I                                                                            | 90                          | V              | 84.3%                            |                           |         |       |
| I                                                                            | 115                         | V              | 98.6%                            |                           |         |       |
| V                                                                            | 120                         | D              | 99.9%                            |                           |         |       |
| K                                                                            | 129                         | P              | 82.7%                            |                           |         |       |
| D                                                                            | 130                         | M              | 98.3%                            |                           |         |       |
| S                                                                            | 163                         | E              | 99.9%                            |                           |         |       |
| R                                                                            | 164                         | L              | 83.8%                            |                           |         |       |
| Q                                                                            | 166                         | E              | 92.2%                            |                           |         |       |
| K                                                                            | 170                         | M              | 91.2%                            |                           |         |       |
| F                                                                            | 175                         | L              | 91.7%                            |                           |         |       |
| K                                                                            | 178                         | Q              | 99.9%                            |                           |         |       |
| V                                                                            | 179                         | Y              | 85.2%                            |                           |         |       |
| W                                                                            | 194                         | L              | 90.9%                            |                           |         |       |
| Y                                                                            | 252                         | F              | 82.9%                            |                           |         |       |
| K                                                                            | 253                         | S              | 90.6%                            |                           |         |       |
| F                                                                            | 308                         | V              | 98.6%                            |                           |         |       |
| N                                                                            | 309                         | L              | 82.7%                            |                           |         |       |
| N                                                                            | 346                         | S              | 95.4%                            |                           |         |       |
| P                                                                            | 348                         | D              | 91.2%                            |                           |         |       |
| Q                                                                            | 350                         | G              | 84.8%                            |                           |         |       |
| D                                                                            | 360                         | K              | 99.9%                            |                           |         |       |
| S                                                                            | 394                         | P              | 96.4%                            |                           |         |       |
| R                                                                            | 428                         | G              | 92.3%                            |                           |         |       |
| K                                                                            | <b>64</b>                   | P              |                                  | 59.9                      |         |       |
| L                                                                            | 77                          | H              |                                  | 59.9                      |         |       |
| T                                                                            | 106                         | A              |                                  | 59.9                      |         |       |
| S                                                                            | 107                         | A              |                                  | 59.9                      |         |       |
| E                                                                            | 167                         | L              |                                  | 59.9                      |         |       |
| G                                                                            | 193                         | A              |                                  | 59.9                      |         |       |
| G                                                                            | 196                         | A              |                                  | 59.9                      |         |       |
| Q                                                                            | 249                         | E              |                                  | 59.9                      |         |       |
| I                                                                            | 257                         | R              |                                  | 59.9                      |         |       |
| V                                                                            | 262                         | T              |                                  | 59.9                      |         |       |
| H                                                                            | 293                         | F              |                                  | 19.1                      |         |       |
| G                                                                            | 349                         | E              |                                  | 59.9                      |         |       |
| M                                                                            | 427                         | G              |                                  | 59.9                      |         |       |
| Q                                                                            | 429                         | R              |                                  | 59.9                      |         |       |

---

<sup>1</sup> Residue numbering is based on the sequence of yeast eEF1A (PDB: 1F60) and **bolded** sites are present in both KnockOut and KnockIn variants (See Table S1 and S2).

<sup>2</sup> Heterotachy/Type I sites with Posterior Probabilities (PP) listed were determined using DIVERGE's Gu99 algorithm, except those in **red** where DIVERGE's Gu01 algorithm was used.

<sup>3</sup> CBD/Type II sites (those additional sites only present in KOI3) were ranked by their reported DIVERGE Type II score.

**Table S3.** Combinations of eEF1B KnockOut Sites (A) and EF-Ts KnockIn Sites (B) with specified signatures of functional divergence and are within 5 Ångstroms of EF-Ts based on a structural alignment of PDBs 1F60 and 1EFU. In the first variant, KIKO2, sites having PP  $\geq$  80% for heterotachy/Type I were selected (36 replacements). In the second variant, KIKO3, sites having PP  $\geq$  80% plus the highest ranked CBD/Type II sites were selected (50 replacements).

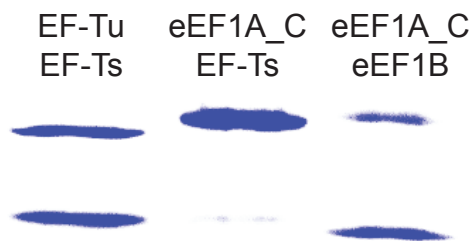

**Figure S4. Control eEF1A variant binds eEF1B but not EF-Ts.**

Binding assays were performed as described in Full Methods. Upper bands correspond to EF-Tu (lane 1) or eEF1A control variant (eEF1A\_C, lanes 2 & 3). Lower bands correspond to bound nucleotide exchange factor (EF-Ts, lanes 1 & 2, or eEF1B, lane 3).

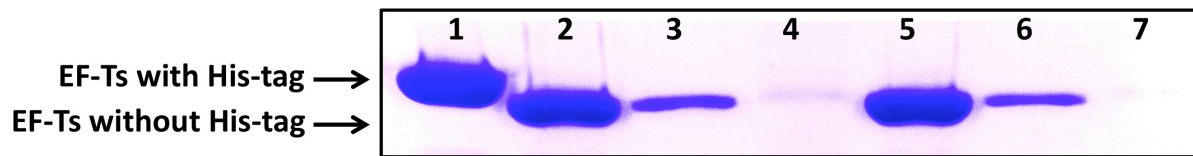

**Figure S5. SDS-PAGE gel analysis of His-tag removal from EF-Ts via thrombin cleavage.** EF-Ts was purified via affinity chromatography with a N-terminal 6XHis-tag on EF-Ts and passed over a Ni<sup>2+</sup> column. The His-tag was removed after incubation with thrombin and the tag-less EF-Ts was passed over two additional Ni<sup>2+</sup> columns to remove any non-cleaved EF-Ts still containing a His-tag. EF-Ts with His-tag (lane 1). Flow-through of thrombin-cleaved EF-Ts passed over Ni<sup>2+</sup> column (lane 2), recovery of wash-step of this column (lane 3) and subsequent elution of the column (lane 4). These lanes demonstrate that thrombin cleaves the vast majority of the His-tag off EF-Ts. As further demonstration that the cleaved EF-Ts was void of His-tag, the sample from lane 2 was passed over an additional Ni<sup>2+</sup> column, the flow-through was collected (lane 5), non-specific binding was removed after the wash step (lane 6), and no protein remained bound after elution (lane 7).
